## **Windows of Susceptibility to Air Pollution During and Surrounding Pregnancy in Relation to Longitudinal Maternal Measures of Adiposity and Lipid Profiles**

**Sandra India Aldana<sup>1</sup>; Danielle Demateis<sup>2</sup>; Damaskini Valvi<sup>1</sup>; Allan C. Just<sup>3</sup>; Iván Gutiérrez-Avila<sup>1</sup>; Guadalupe Estrada-Gutierrez<sup>4</sup>; Martha María Téllez Rojo<sup>5</sup>; Robert O. Wright<sup>1</sup>; Andrea A. Baccarelli<sup>6</sup>; Haotian Wu<sup>7</sup>; Kayleigh P. Keller<sup>2</sup>; Ander Wilson<sup>2</sup>; Elena Colicino<sup>1</sup>**

<sup>1</sup>Department of Environmental Medicine and Climate Science, Icahn School of Medicine at Mount Sinai, New York, NY, USA

<sup>2</sup>Department of Statistics, Colorado State University, Fort Collins, CO, USA

<sup>3</sup>Brown University, Providence, RI, USA

<sup>4</sup>Department of Immunobiochemistry, Research Division, National Institute of Perinatology, Mexico City, Mexico.

<sup>5</sup>Center for Nutrition and Health Research, National Institute of Public Health, Cuernavaca, Morelos, Mexico.

<sup>6</sup>Harvard T.H. Chan School of Public Health, Boston, MA, USA.

<sup>7</sup>Department of Environmental Health Sciences, Mailman School of Public Health, Columbia University, New York, NY, USA

\*Corresponding author:

Sandra India Aldana, MPH, MPhil, PhD  
Postdoctoral Fellow  
Department of Environmental Medicine and Climate Science  
Icahn School of Medicine at Mount Sinai  
17 E 102 St, Floor 3  
New York, NY 10029  
Email: [sandra.india-aldana@mssm.edu](mailto:sandra.india-aldana@mssm.edu)

## **Abstract**

Pregnancy is a critical window for long-term metabolic programming of fetal effects stemming from airborne particulate matter  $\leq 2.5\mu\text{m}$  ( $\text{PM}_{2.5}$ ) exposure. Yet, little is known about long-term metabolic effects of  $\text{PM}_{2.5}$  exposure during and surrounding pregnancy in mothers. We assessed potential critical windows of  $\text{PM}_{2.5}$  exposure during and surrounding pregnancy with maternal adiposity and lipid measures later in life. We included 517 pregnant women from the PROGRESS cohort with adiposity [body mass index (BMI), waist circumference (WC), % body fat] and lipids [total cholesterol, high-density-lipoprotein (HDL), low-density-lipoprotein (LDL)] measured repeatedly at 4, 6 and 8 years post-delivery. Monthly average  $\text{PM}_{2.5}$  exposure was estimated at each participant's address using a validated spatiotemporal model. We employed distributed lag interaction models (DLIMs) adjusting for socio-demographics and clinical covariates. We found that a  $1\ \mu\text{g}/\text{m}^3$  increase in  $\text{PM}_{2.5}$  exposure throughout mid-/late-pregnancy was associated with higher WC at 6-years post-delivery, peaking at 6 months of gestation: 0.04 cm (95%CI: 0.01, 0.06). We also identified critical windows of  $\text{PM}_{2.5}$  exposure during and surrounding pregnancy associated with higher LDL and lower HDL both measured at 4 years post-delivery with peaks at pre-conception for LDL [0.17 mg/dL (95%CI: 0.00, 0.34)] and at the 11<sup>th</sup> month after conception for HDL [-0.07 mg/dL (95%CI: -0.11, -0.02)]. Stratified analyses by fetal sex indicated stronger associations with adiposity measures in mothers carrying a male, whereas stronger associations were observed with lipids in mothers carrying a female fetus. Stratified analyses also indicated potential stronger deleterious lagged effects in women with folic acid intake lower than 600mcg/day during pregnancy.

## **Keywords**

Critical windows; pregnancy; maternal health; air pollution; adiposity; lipids

## 1 1. Introduction

2  
3 Obesity and dyslipidemia are key cardiometabolic risk factors and conditions that predispose  
4 individuals to increased risk of stroke, disability, and mortality.<sup>1,2</sup> These conditions have  
5 increased in North America at an alarming rate throughout the past decades<sup>3-10</sup> and are  
6 particularly more prevalent among Hispanics.<sup>11,12</sup> In Mexican adults, dyslipidemias are the most  
7 prevalent risk factor for cardiovascular diseases,<sup>13</sup> including hypoalphalipoproteinemia, also  
8 known as low high-density lipoprotein (HDL), and high low-density lipoprotein (LDL), with an  
9 estimated prevalence of ~55%. Excess adiposity and low HDL predispose individuals to  
10 increased metabolic syndrome, a condition on the rise in Mexico, where it is estimated to affect  
11 56% of the adult population.<sup>6</sup> Importantly, metabolic disease-related morbidities and mortality  
12 affect women more than men in Mexico.<sup>10</sup> According to the 2018-2019 ENSANUT National  
13 Health Nutrition Survey there are substantial higher rates of generalized and abdominal obesity  
14 in Mexican adult women compared to men,<sup>14</sup> with a peak prevalence in women of 40.2% for  
15 generalized obesity and 88% for abdominal obesity.

16  
17 Airborne particulate matter with an aerodynamic diameter of 2.5 microns or smaller (PM<sub>2.5</sub>) is a  
18 ubiquitous exposure in urban, industrial, and rural environments.<sup>15,16</sup> PM<sub>2.5</sub> exposure can have  
19 endocrine-disrupting effects<sup>17-20</sup> and is considered an emerging risk factor for obesity and  
20 adverse metabolic outcomes.<sup>21-23</sup> Experimental studies in animals and epidemiological research  
21 in humans have demonstrated that PM<sub>2.5</sub> exposure may promote weight gain and adipose tissue  
22 expansion, and alter lipid metabolism.<sup>24-29</sup> Mechanisms by which PM<sub>2.5</sub> could influence  
23 metabolic diseases include hormonal alteration, increased inflammation, oxidative stress, and  
24 reactive oxygen species-induced endothelial dysfunction.<sup>30-34</sup> Furthermore, PM<sub>2.5</sub> exposure  
25 during pregnancy has been suggested to be a critical exposure window for a wide variety of  
26 health-related outcomes in both birthing-mothers and children.<sup>35-40</sup> However, most of the

27 literature examining critical PM<sub>2.5</sub> exposure windows during pregnancy has primarily focused on  
28 children's health, largely missing potential long-term effects in mothers.<sup>41</sup> Pregnancy constitutes  
29 a major period of physiological changes<sup>42</sup> including pro-inflammatory processes<sup>43-45</sup> and weight  
30 gain.<sup>46,47</sup> The numerous physiological changes occurring during pregnancy may lead to potential  
31 lingering chronic diseases and metabolic effects.<sup>48-52</sup> Research on pregnancy as a window of  
32 susceptibility to environmental exposures in mothers is scarce<sup>41</sup> and overlook a potential period  
33 in which metabolic conditions may worsen or can effectively be prevented or treated.

34  
35 To date, no study has evaluated how PM<sub>2.5</sub> exposure during and surrounding gestation may  
36 affect maternal obesity and dyslipidemia in the years following delivery. Therefore, we assessed  
37 potential critical windows of PM<sub>2.5</sub> exposure during and surrounding pregnancy with later  
38 changes in markers for anthropometry and lipids in the years following delivery in women from  
39 the Mexican Programming Research in Obesity, Growth, Environment and Social Stressors  
40 (PROGRESS) study. To achieve this, we employ the novel distributed lag models with  
41 interaction to identify critical windows of PM<sub>2.5</sub> exposure for maternal health endpoints  
42 repeatedly measured over post-delivery follow-up visits.<sup>53</sup> Furthermore, given that maternal  
43 metabolic health and associated mechanisms are considered sex-dimorphic<sup>54</sup> and that folic acid  
44 (FA) may attenuate adverse health effects from air pollutants,<sup>55</sup> we also hypothesized potential  
45 effect modification by fetal sex and FA.

46

## 47 **2. Material and Methods**

48

### 49 2.1 Study Population

50 The PROGRESS study enrolled 948 mother-children pairs between 2007-2011 that were  
51 followed for over a decade.<sup>56</sup> Healthy pregnant women, affiliated with the Mexican Social  
52 Security Institute, were recruited during the 2<sup>nd</sup> trimester of pregnancy (12-20 gestational

53 weeks). Any pregnant woman,  $\geq 18$  years old and living in Mexico City, with no intention of  
54 changing address location for at least three years, were eligible for enrollment. Medical  
55 exclusion criteria included history of infertility, heart or renal diseases, diabetes, psychosis or  
56 use of anti-epilepsy drugs, use of steroids, consumption of one or more alcoholic drinks per day,  
57 or drug addiction. All women enrolled in the study agreed to sign a consent form in Spanish.  
58 This study was approved by the Institutional Review Boards of the participating institutions: the  
59 Icahn School of Medicine at Mount Sinai and the “Instituto Nacional de Salud Pública” in  
60 Mexico.

61

## 62 2.2 Ambient PM<sub>2.5</sub> Exposure at Participants’ Addresses

63 Daily PM<sub>2.5</sub> predictions with a 1×1-km spatial resolution came from our machine-learning models  
64 developed for the Mexico City Metropolitan Area. Our models employed extreme gradient  
65 boosting (XGBoost) and inverse-distance weighting (IDW), incorporating satellite-based aerosol  
66 optical depth data from NASA’s Terra and Aqua satellites, meteorological information, and land-  
67 use variables (**Methods S1**).<sup>57</sup> To limit the daily exposure variability and facilitate the  
68 interpretation of long-term maternal health effects from PM<sub>2.5</sub>, we averaged the daily PM<sub>2.5</sub>  
69 exposures into monthly ambient PM<sub>2.5</sub> exposure concentrations. We then focused on exposure  
70 surrounding pregnancy: pre-conception (approximately one and two months prior to the last  
71 menstrual period, LMP), during pregnancy (months 0-9 after LMP), and up to one year after  
72 childbirth (months 10-22 after LMP). We examine exposure time up to one year beyond birth as  
73 we hypothesize that lingering immediate effects from pregnancy or giving birth could make  
74 women more susceptible to environmental exposures.

75

## 76 2.3 Outcomes

77 Repeated anthropometric and lipid measures were collected at three follow-up visits 4, 6 and 8  
78 years post-delivery (corresponding to approximately 48, 72, and 96 months after childbirth).

79 Maternal anthropometric measures (weight, height, waist circumference, and body fat) were  
80 collected using standardized protocols.<sup>58-60</sup> We calculated body mass index (BMI) based on  
81 measured height (collected using a Seca 206 roller tape) and weight (collected by a trained  
82 physician). Medical staff measured body fat using InBody 270 or InBody 370 Body Composition  
83 Analyzers during each monitoring visit. WC was measured using a Seca tape (model 201)  
84 above the iliac crest.<sup>60</sup> Total cholesterol and high-density lipoprotein (HDL) cholesterol were  
85 measured by enzymatic photometric assays on a Response 910 automated analyzer (DiaSys  
86 Diagnostic Systems, Holzheim, Germany) in fasting plasma collected from participants at all  
87 post-delivery visits. Low-density lipoprotein (LDL) concentration was derived using the  
88 Friedewald equation.<sup>61</sup>

89

#### 90 2.4 Additional Variables

91 Information on socio-demographic factors (age, marital status, socio-economic status) was self-  
92 reported at recruitment during the 2<sup>nd</sup> trimester of pregnancy. PROGRESS also collected  
93 lifestyle information at baseline and across follow-up visits: smoking, alcohol intake, medications  
94 (**Methods S2**), and parity. Self-reported information on multiple pregnancies throughout the  
95 follow-up was also monitored and documented in PROGRESS. Pregnancy start date was  
96 defined as the LMP, which was used as a proxy of the month of conception in this study. We  
97 used a standard physical assessment of gestational age (Capurro method)<sup>62</sup> when gestational  
98 age differed by more than three weeks from that assigned by the LMP (~4% of participants in  
99 the cohort). We estimated pre-pregnancy BMI in accordance to previous published methods  
100 using the height at recruitment and the LMP reported weight.<sup>58,63</sup> We assessed socio-economic  
101 status (SES) using the previously validated Mexican Association of Market and Public Opinion  
102 Research Agencies (Spanish acronym AMAI) index used in Mexico.<sup>64</sup> The AMAI index is an  
103 individual-level variable that considered a total of 13 factors including the education of the head  
104 of household, number of appliances in the household, car ownership, and so forth. The index

105 denotes six categories that were eventually collapsed into three levels of SES: lower (AMAI  
106 categories D and E), medium (AMAI categories C and D+), and higher (AMAI categories A, B,  
107 and C+). Our SES measures are relative as the cohort was predominantly low SES. Information  
108 on the sex of the child and self-reported FA supplementation intake during pregnancy (at  
109 trimesters 2 and 3) were also obtained.

110  
111

## 112 2. 5 Statistical Analyses

113 A total of n=806 women had monthly PM<sub>2.5</sub> exposure from two months prior to LMP through  
114 month 22 after LMP and no missing information on pre-pregnancy BMI, age, or meteorological  
115 season (**Figure S1**). Missing monthly exposure data during the time period of interest  
116 (accounting for <0.3% of the total monthly air pollution data in the cohort) were imputed using  
117 time series weighted moving averages.<sup>65</sup> Women with at least one cardiometabolic marker  
118 measured at any follow-up visit were eligible for inclusion resulting in an analytic sample size of  
119 n=517.

120

121 To evaluate the potential critical windows of PM<sub>2.5</sub> exposure over 25 months in later onset of  
122 cardiometabolic conditions (i.e. higher adiposity and cholesterol levels) at the 4, 6, and 8-year  
123 post-delivery visits, we implemented distributed lag interaction models (DLIMs).<sup>53</sup> The DLIM  
124 estimates a linear exposure-time-response function that varies continuously by time after  
125 delivery and by outcome assessment time (**Methods S3**). We compared three possible models  
126 for how the exposure effect varies across outcome time using a bootstrap likelihood ratio test:  
127 no modification, linear modification (i.e. linear scaling of the linear exposure effect across  
128 outcome times), or complex non-linear modification across outcome times. In all models, we  
129 adjusted for a core set of covariates based on their associations with both the exposure and  
130 outcomes or based on their clinical relevance as previously identified (**Figure S2**): age at

131 parturition (continuous),<sup>66</sup> pre-pregnancy BMI (continuous),<sup>67</sup> socio-economic status (lower,  
132 medium, higher),<sup>68</sup> smoking during pregnancy (any passive or active smoking reported during  
133 pregnancy),<sup>69,70</sup> marital status (single, separated or divorced vs. married or living with a  
134 partner),<sup>71,72</sup> parity at baseline (1<sup>st</sup> pregnancy, 2<sup>nd</sup> pregnancy, and 3<sup>rd</sup> or more pregnancies at  
135 recruitment),<sup>73,74</sup> season (dry-cold/November to February, dry-warm/March and April, rainy/May  
136 to October),<sup>75,76</sup> medications to treat cardiometabolic diseases<sup>77</sup> (self-report of a drug treatment  
137 for abnormal levels of either glucose, triglycerides, high-density lipoprotein (HDL), or blood  
138 pressure vs. lack thereof), alcohol intake (yes/no),<sup>78</sup> follow-up visit (stage), and follow-up time in  
139 months squared to allow for a non-linear effect. Given that lifestyle variables such as alcohol  
140 intake, medications, and pregnancy history could change over time, we updated the models with  
141 information on lifestyle data at each follow-up stage (at 4, 6, and 8 years post-delivery) as time-  
142 varying covariates.

143  
144 We performed sensitivity analyses by fitting DLIMs 1) without pre-pregnancy BMI as covariate,  
145 2) controlling for time-varying 1-year average PM<sub>2.5</sub> exposure prior to visit, and 3) without time-  
146 varying pregnancy as covariate, generating plots that are smoothed to allow for comparison of  
147 sensitivity analyses to our main analyses. Additional analyses were also conducted stratifying  
148 by important factors during pregnancy based on prior clinical relevance and/or previous  
149 research in PROGRESS. Given the shifting sex-steroid hormone concentrations during  
150 pregnancy dependent on fetal sex<sup>79,80</sup> and the protective interaction effects of FA with air  
151 pollutant mixtures and metabolic health in PROGRESS women,<sup>81</sup> we conducted stratified  
152 analyses by 1) fetal sex (mothers carrying a male vs. a female fetus) and by 2) FA intake using  
153 the average recommended FA supplementation for pregnant women according to clinical  
154 guidelines (600 mcg/day).<sup>82</sup> All statistical analyses were conducted using R software (version  
155 4.3.0) with package *dlim* (version 0.1.0).

156



157 **3. Results**

158  
159 Women were exposed on average to a PM<sub>2.5</sub> concentration of 22.8 µg/m<sup>3</sup> (standard deviation  
160 (SD): 1.5; interquartile range (IQR): 2.21) across the 25-month span from 2 month pre-  
161 conception up to 1-year post-partum (**Table 1; Figure S3**). Women were slightly overweight  
162 prior to pregnancy (nearly ~60% were either overweight or obese) with a mean (SD) BMI of 26.5  
163 (4.1) kg/m<sup>2</sup> and were on average (SD) 29 (5.6) years old at the time of parturition. The majority  
164 of women had low socio-economic status (53%), reported previous pregnancies at baseline  
165 prior to index pregnancy (61%), were married or lived with a partner at the time of recruitment  
166 (81%), and did not smoke nor were exposed to passive (2<sup>nd</sup>-hand) smoke during pregnancy  
167 (63%). Participants were followed for nearly a decade after parturition and attended up to three  
168 follow-up examination visits at approximately 4 years [mean (min, max): 57 months (48, 80)], 6  
169 years [mean (min, max): 80 months (71, 115)], and 8 years post-delivery [mean (min, max): 115  
170 months (97, 142)].

171  
172 Using DLIMs, we found evidence of non-linear modification of the exposure-time-response  
173 function across outcome times for all outcomes using the bootstrap likelihood ratio test (rejected  
174 null of linear modification versus the alternative of non-linear modification). We estimated critical  
175 windows of exposure surrounding pregnancy during which PM<sub>2.5</sub> exposure was linked with  
176 several anthropometric measures and lipid levels (**Tables S1-S6**), although these associations  
177 were not identified as statistically significant for all cardiometabolic markers examined.  
178 Pregnancy PM<sub>2.5</sub> exposure was associated with changes in several metabolic health measures  
179 up to the 6-year post-delivery visit (**Figures 1-2**). A 1-µg/m<sup>3</sup> increase in PM<sub>2.5</sub> exposure  
180 throughout the 2<sup>nd</sup> and 3<sup>rd</sup> trimesters of pregnancy (gestational months: 4-8 after LMP) was  
181 associated with an increase in WC levels at the 6-year post-delivery visit (**Figure 1**). The peak  
182 effect was at 6 months of gestation which showed an increase of 0.04 cm in WC (95% CI: 0.01,

183 0.06) per  $\mu\text{g}/\text{m}^3$   $\text{PM}_{2.5}$  (**Figure 1; Table S2**). A suggestive late pregnancy window of  
184 susceptibility to  $\text{PM}_{2.5}$  exposure was identified in relation to WC levels at the 4-year post-delivery  
185 visit [gestational month 9 after LMP:  $\beta = 0.03$  (95% CI: -0.01, 0.06)]. In addition, we identified  
186 alterations in BMI at the 8-year post-delivery visit in association with a peri-conception window  
187 of  $\text{PM}_{2.5}$  exposure (during pre-conception and early-pregnancy period) (**Figure 1; Table S1**).  
188 These negative  $\text{PM}_{2.5}$ -BMI associations were not sustained in the sensitivity (**Figure S4**) and in  
189 the female-stratified (**Figure S8**) analyses, and can be driven by the over-adjustment with pre-  
190 pregnancy BMI. There was no evidence of associations in relation to percent body fat.

191  
192  $\text{PM}_{2.5}$  exposure surrounding pregnancy was associated with a dysregulation of several lipid  
193 levels at the 4-year post-delivery visit, but not thereafter (**Figure 2**). We observed a susceptible  
194  $\text{PM}_{2.5}$  exposure window from the 2<sup>nd</sup> trimester of pregnancy and up to the early post-partum  
195 period (critical window between months 6 and 18 after LMP) on high-density lipoprotein (HDL)  
196 cholesterol 4 years post-delivery (**Table S5**). The peak effect at the 11<sup>th</sup> month after LMP was  
197 associated with a 0.07 mg/dL decrease in HDL (95% CI: -0.11, -0.02) per  $\mu\text{g}/\text{m}^3$  increase in  
198  $\text{PM}_{2.5}$ . In addition, we observed associations between increased  $\text{PM}_{2.5}$  exposure throughout  
199 preconception, pregnancy, and the post-partum period (2 months prior to and up to month 17  
200 after LMP) and higher low-density lipoprotein (LDL) cholesterol at the 4-year post-delivery visit.  
201 The largest associations occurred during pre-conception (2 months prior to conception) which  
202 led to an increase of 0.17 mg/dL in LDL (95% CI: 0.00, 0.34) per  $\text{PM}_{2.5}$   $\mu\text{g}/\text{m}^3$  (**Table S6**). While  
203 no critical windows of susceptibility to  $\text{PM}_{2.5}$  were observed with respect to total cholesterol, the  
204 overall trend was positive in directionality between the pre-conception and pregnancy  $\text{PM}_{2.5}$   
205 exposure periods with cholesterol levels at the 4-year post-delivery visit that attenuated over  
206 time.

207

208 Compared to main results, sensitivity analyses that did not control for pre-pregnancy BMI  
209 showed consistent windows of susceptibility to PM<sub>2.5</sub> exposure across health outcomes and  
210 across follow-up visits (**Figures S4-S5**). Also, no notable differences were observed in  
211 sensitivity models that controlled for time-varying 1-year PM<sub>2.5</sub> exposures average prior to  
212 follow-up visits (**Figures S6-S7**), or without time-varying pregnancies as covariate (**Figures S8-**  
213 **S9**). Stratified analyses by fetal sex indicated stronger effects positive in directionality on  
214 anthropometric markers in pregnant mothers carrying a male fetus compared to mothers  
215 carrying a female fetus (**Figures S10-S12**), particularly for WC (**Figure S11**). On the other  
216 hand, stratified analyses by fetal sex showed more persistent effects from PM<sub>2.5</sub> exposures  
217 during pregnancy on lipids over time in pregnant mothers carrying a female fetus (**Figures S13-**  
218 **S15**). For instance, windows of susceptibility to PM<sub>2.5</sub> on higher levels of LDL were sustained  
219 throughout all follow-up visits in pregnant mothers carrying a female fetus whereas the  
220 associations disappeared over time in those carrying a male fetus (**Figure S15**). Interestingly,  
221 stratified analyses by FA intake showed more prominent deleterious effects in the low FA intake  
222 group as compared to the high FA intake group (**Figures S16-S21**). This is apparent for all  
223 anthropometric outcomes but particularly for WC and body fat where women with lower FA  
224 intake levels during pregnancy had lagged PM<sub>2.5</sub>-induced increased levels of adiposity as  
225 compared to women with higher FA intake levels (**Figures S17-S18**). Similarly, it is notable that  
226 windows of susceptibility to PM<sub>2.5</sub> on higher LDL and lower HDL cholesterol were stronger in  
227 women with lower FA intake levels than in their counterparts (**Figures S20-S21**).

228

#### 229 **4. Discussion**

230

231 This is the first study assessing long-term alterations of maternal adiposity and lipid measures  
232 stemming from PM<sub>2.5</sub> exposures occurring during and surrounding the time of pregnancy (peri-  
233 pregnancy). Several maternal biomarkers assessed at the 4- and 6-year post-delivery visits

234 showed potentially deleterious associations from PM<sub>2.5</sub> exposures during the period surrounding  
235 pregnancy. Long-term adverse associations induced by pregnancy PM<sub>2.5</sub> exposure were  
236 particularly observed for WC (at the 6 year post-delivery visit) and for lipids (at the 4 year post-  
237 delivery visit). Critical PM<sub>2.5</sub> exposure windows were identified during mid and late pregnancy for  
238 WC, whereas for lipid outcomes sensitive windows were prominent throughout all pregnancy  
239 and during the first post-partum months. Stratified analyses by fetal sex indicated potential  
240 stronger deleterious effects with anthropometric measures that were more prominent in mothers  
241 carrying a male fetus, whereas PM<sub>2.5</sub> associations with lipid biomarkers were stronger in  
242 mothers carrying a female fetus. Stratified analyses indicated also potential stronger deleterious  
243 effects in women with lower FA intake during pregnancy.

244  
245 In this study, we showed that PM<sub>2.5</sub> exposures during and surrounding pregnancy could  
246 exacerbate potential physiological changes occurring during gestation and we also showed that  
247 those associations can last up to 6 years post-delivery. Pregnancy induces physiological  
248 changes that uniquely affect maternal metabolism influencing post-partum weight retention.<sup>83,84</sup>  
249 Weight gain can be sustained after delivery through weight retention triggered by pro-  
250 inflammatory processes starting during conception.<sup>85-87</sup> For instance, during gestation major  
251 changes in lipid and glucose homeostasis ensure an adequate supply of energy to the  
252 developing fetus.<sup>88,89</sup> These changes could promote body fat accumulation,<sup>90,91</sup> changes in leptin  
253 hormone levels,<sup>92</sup> increased glucose production,<sup>93</sup> which in turn, can lead to increased risk of  
254 developing gestational diabetes<sup>94</sup> and subsequent type-2 diabetes or cardiovascular diseases  
255 later in life.<sup>49,50</sup> Increased adiposity has been previously observed in adults exposed to PM<sub>2.5</sub>.<sup>95-</sup>

256 <sup>97</sup>

257  
258 PM<sub>2.5</sub> exposures during mid-pregnancy altered cholesterol levels up to the 4-year post-delivery  
259 visit. Our findings showed that pregnancy and early post-partum PM<sub>2.5</sub> exposure increased

260 levels of LDL and decreased levels of HDL. These PM<sub>2.5</sub>-associated increases in LDL levels or  
261 decreases in HDL levels in women having undergone pregnancy were consistent with previous  
262 literature in non-pregnant adults.<sup>28,98</sup> Higher LDL and lower HDL cholesterol levels have been  
263 shown to predispose women to higher risk of cardiovascular events later in life.<sup>99-101,102,103</sup>  
264 Currently, there is a scarcity of studies examining lipid levels in pregnant women that also  
265 examine critical periods of susceptibility to PM<sub>2.5</sub> but one lipidomic study indicated that PM<sub>2.5</sub>  
266 during the 2<sup>nd</sup> trimester can exacerbate adverse birth outcomes in women with hyperlipidemia  
267 through increased inflammation.<sup>104</sup>

268

269 Our findings also suggested that pregnancy PM<sub>2.5</sub> exposures are associated with adiposity and  
270 adverse lipid alterations up to 6 years post-delivery but not at 8 years in our sample. It is  
271 possible that PM<sub>2.5</sub> exposures during and surrounding pregnancy may still have lingering  
272 deleterious effects at later stages in life but subsequent exposures could also be inflicting  
273 adverse effects and drown out the signal of more distant exposure such as those occurring in  
274 pregnancy years prior. Moreover, future studies with longer follow-up time are needed to  
275 elucidate whether protracted effects from pregnancy PM<sub>2.5</sub> exposure go beyond 6 years post-  
276 delivery. To evaluate the potential influence of concurrent PM<sub>2.5</sub> exposures, we adjusted for  
277 average PM<sub>2.5</sub> exposures throughout a 1-year span prior to each examination visit as a time-  
278 varying variable in sensitivity analyses, which did not change the results of primary analyses.  
279 Although differences in associations over time may reflect women's lifestyle changes and/or  
280 weight changes after giving birth, we controlled for several time-varying lifestyle variables in  
281 analyses. In addition, we did not observe clear patterns of associations between lagged PM<sub>2.5</sub>  
282 exposures throughout pregnancy and anthropometric markers other than WC, suggesting that  
283 protracted PM<sub>2.5</sub> exposures may have later effects on abdominal adiposity but perhaps not on  
284 generalized adiposity in birthing people, which is in line with the absence of associations with  
285 total body fat in our study.

286

287 We also observed potential diverging effects by fetal sex in our study. Critical windows of  
288 susceptibility to pregnancy PM<sub>2.5</sub> exposure may be sex-dimorphic due to different circulating  
289 levels of sex-steroid hormones during pregnancy<sup>79,80</sup> that may exacerbate or alter effects from  
290 air pollution. Our findings are consistent with previous literature indicating that carrying a male  
291 fetus is accompanied with a higher risk of poor cardiovascular health for the mother resulting in  
292 pregnancy complications and/or adverse health.<sup>54</sup> Moreover, our results indicated also a  
293 suggestive protective role of FA against protracted effects from PM<sub>2.5</sub> exposure. These results  
294 are consistent with prior findings in PROGRESS mothers showing beneficial effects of higher  
295 FA intake levels (above 600 mcg/day) during pregnancy in the associations of air pollutant  
296 mixtures and risk of liver injury.<sup>81</sup> In addition to cardiometabolic outcomes, FA has been shown  
297 in prior literature to attenuate the risk of adverse birth outcomes induced by airborne particulate  
298 matter during pregnancy.<sup>55</sup> However, these hypotheses suggested in stratified analyses warrant  
299 further exploration and need to be formally tested with new methods accommodating for  
300 distributed lag models that can handle multiple modifying factors.

301

302 We also recognize potential limitations in our study. First, estimates for months 7 through 9 after  
303 LMP refer to a population at the 3<sup>rd</sup> trimester of gestation but also encompasses a small fraction  
304 of women (n=55; ~11%) with early-term pregnancies (baby born before the 37<sup>th</sup> week of  
305 pregnancy). Second, our study intended to focus specifically in the most relevant epidemics of  
306 generalized and abdominal adiposity in the Mexican population, as well as its top major  
307 dyslipidemias: hypoalphalipoproteinemia and hypercholesterolemia. However, other markers of  
308 metabolic syndrome such as blood pressure and diabetes-markers may be of interest to explore  
309 in future studies. We also acknowledge potential measurement error from self-reported  
310 covariates and underreport of compromising lifestyle information during pregnancy such as  
311 alcohol intake and smoking.<sup>105,106</sup> While we acknowledge that measurement errors of the

312 exposure modeling can introduce some degree of exposure misclassification, we believe that  
313 our overall approach— including the use of validated models, cross-validation, and conservative  
314 monthly exposure averaging— reduces these errors and enhances the reliability of the  
315 estimates. We also used the first day of the LMP as a proxy for conception, which can be prone  
316 to biological error.<sup>107,108</sup> However, we do not expect a substantial change in the interpretation as  
317 it was conducted in monthly intervals, thus minimizing the biological error, and we used a  
318 validated approach to identify LMP when gestational age differed by more than three weeks to  
319 LMP (**Methods S2**).<sup>62</sup> In addition, due to the poor analytical performance of LDL-C analysis  
320 methods,<sup>109,110</sup> no direct LDL measurement in blood was performed in our study. Although a  
321 comprehensive adjustment of covariates was implemented, unmeasured confounding biasing  
322 results could also still be present as this is an observational study. Given that it is an  
323 observational study, we recognize that we cannot directly establish a causal relationship  
324 between critical windows to PM<sub>2.5</sub> exposure on maternal lipids and waist circumference and that  
325 instead we are examining associations. Similarly, we did not measure other concurrent  
326 environmental exposures that could be correlated with PM<sub>2.5</sub> driving the associations. Also, our  
327 effect estimates are small and results should be interpreted with caution. Last, although this  
328 study in Mexican women may not be generalizable to other populations, using a relatively  
329 homogenous sample increases the internal validity of our results.

330

331 Our study also benefits from several strengths. To our knowledge, this is the first study  
332 assessing the long-term cardiometabolic effects of pregnancy PM<sub>2.5</sub> exposure in a Hispanic  
333 population and using a comprehensive panel of anthropometric and lipids. Our study also uses  
334 state-of-the-art methods to characterize daily PM<sub>2.5</sub> air pollution data. We also used a novel  
335 application of a recently developed statistical model to simultaneously estimate critical windows  
336 of exposure in a trajectory analysis with repeated outcome assessment and a continuous time  
337 component. This has the advantage to reduce bias using the DLM framework<sup>111</sup> while pooling

338 strength and gaining power from repeated outcome assessments. We also leveraged a  
339 population of pregnant women from Central Mexico exposed to high PM<sub>2.5</sub> levels that could be  
340 more susceptible to developing cardiometabolic diseases. In Mexico, the prevalence of  
341 overweight and obesity reached 39% in 2018 with mid-life adults, and women in particular,  
342 having the highest rates.<sup>112</sup> Our study also highlights that in Mexico City average PM<sub>2.5</sub> levels  
343 are 4-5 times the WHO recommended annual average levels (5 µg/m<sup>3</sup>),<sup>113</sup> making these findings  
344 of interest to help drive policy change, and particularly in view of the UN Sustainable  
345 Development Goals aiming to prevent non-communicable diseases in lower-middle-income  
346 countries.<sup>114</sup> Additional studies should be conducted in pregnant women with more than eight  
347 years of follow-up, using multi-pollutant protracted exposures, directly measuring LDL via  
348 centrifugation or homogenous assays,<sup>109,115</sup> leveraging different populations outside Mexico,  
349 and evaluating high-order interactions with effect modifiers. Our study provides a framework for  
350 assessing windows of susceptibility with trajectory outcomes that can be replicated in such  
351 future studies.

352

## 353 **5. Conclusion**

354

355 Pregnancy itself may constitute a critical window to PM<sub>2.5</sub> exposure for dysregulated long-term  
356 maternal metabolic health after delivery. Pregnant women could largely benefit from policies  
357 targeting reduction to air pollution exposure.

358

359

## 360 **6. Data Sharing**

361 Data is only available upon reasonable request from the authors.

362



363 **7. Funding**

364 This project was supported by NIEHS grant R01ES032242 (PI: Colicino, Wu); R01ES034521  
365 (PI: Colicino, Jusko).

366

367 **8. Acknowledgements**

368 The work involved in this study was also supported by UL1TR004419 (PI: Wright),  
369 P30ES023515 (PI: Wright), R01ES029943 (PI: Kioumourtzoglou, Weisskopf), R01ES033688  
370 (PI: Valvi), R21ES035148 (PI: Valvi).

371

372 **9. Author Contributions**

373 E.C., A.W.: Conceptualization; S.I.A., D.D.: Data curation, Formal analysis, Investigation; E.C.,  
374 H.W., A.A.B.: Funding acquisition; S.I.A., D.D.: Software, Visualization; S.I.A., D.D., E.C., A.W.,  
375 K.K.: Methodology; S.I.A.: Roles/Writing—original draft; D.D., D.V., A.C.J., I.G.A., G.E.,  
376 M.M.T.R., R.O.W., A.A.B., H.W., K.P.K., A.W., E.C.: Writing—review & editing.

**Table 1. Main Participant Characteristics in PROGRESS (n=517) <sup>a</sup>**

| Variables                                                             | Mean (SD) [Range]; n (%) |
|-----------------------------------------------------------------------|--------------------------|
| <u>Exposure</u>                                                       |                          |
| Average Pregnancy PM <sub>2.5</sub> (µg/m <sup>3</sup> ) <sup>b</sup> | 22.8 (1.5) [15.9, 27.7]  |
| <u>Fixed Covariates</u>                                               |                          |
| Age at parturition (years)                                            | 28.1 (5.6) [18.0, 44.0]  |
| Pre-pregnancy BMI <sup>c</sup>                                        | 26.5 (4.1) [18.4, 43.5]  |
| Obese (BMI≥30)                                                        | 96 (19%)                 |
| Overweight (BMI≥25 & <30)                                             | 214 (41%)                |
| Normal (BMI≥18.5 & <25)                                               | 205 (40%)                |
| Underweight (BMI<18.5)                                                | 2 (0.4%)                 |
| AMAI SES Index <sup>d</sup>                                           |                          |
| Lower                                                                 | 272 (53%)                |
| Medium                                                                | 190 (37%)                |
| Higher                                                                | 55 (11%)                 |
| Passive or Active Smoking during Pregnancy                            |                          |
| No Smoking during Pregnancy                                           | 324 (63%)                |
| Smoking during Pregnancy                                              | 193 (37%)                |
| Marital Status at Baseline                                            |                          |
| Married or Living With Partner                                        | 417 (81%)                |
| Single, Separated or Divorced                                         | 100 (19%)                |
| Parity at Baseline                                                    |                          |
| First Pregnancy                                                       | 200 (39%)                |
| Second Pregnancy                                                      | 181 (35%)                |
| Three or More Pregnancies                                             | 136 (26%)                |
| Meteorologic Season at Last Menstrual Period                          |                          |
| Dry/Cold                                                              | 158 (31%)                |
| Dry/Warm                                                              | 105 (20%)                |
| Rainy                                                                 | 254 (49%)                |
| <u>Time-Varying Covariates</u>                                        |                          |
| Cardiometabolic Medications by Year ~4 <sup>e</sup>                   |                          |
| Yes                                                                   | 14 (2.7%)                |
| No/Unknown                                                            | 503 (97.3%)              |
| Cardiometabolic Medications by Year ~6 <sup>e</sup>                   |                          |
| Yes                                                                   | 20 (3.9%)                |
| No/Unknown                                                            | 497 (96.1%)              |
| Cardiometabolic Medications by Year ~8 <sup>e</sup>                   |                          |
| Yes                                                                   | 37 (7.2%)                |
| No/Unknown                                                            | 480 (92.8%)              |
| Alcohol Intake by Year ~4 <sup>f</sup>                                |                          |
| Yes                                                                   | 59 (11%)                 |
| No                                                                    | 458 (89%)                |
| Alcohol Intake by Year ~6 <sup>f</sup>                                |                          |
| Yes                                                                   | 53 (10%)                 |
| No                                                                    | 464 (90%)                |
| Alcohol Intake by Year ~8 <sup>f</sup>                                |                          |

|                                                      |                           |
|------------------------------------------------------|---------------------------|
| Yes                                                  | 55 (11%)                  |
| No                                                   | 462 (89%)                 |
| Multiple Pregnancies by Year ~4 <sup>g</sup>         |                           |
| Yes                                                  | 131 (25%)                 |
| No                                                   | 386 (75%)                 |
| Multiple Pregnancies by Year ~6 <sup>g</sup>         |                           |
| Yes                                                  | 158 (31%)                 |
| No                                                   | 359 (69%)                 |
| Multiple Pregnancies by Year ~8 <sup>g</sup>         |                           |
| Yes                                                  | 197 (38%)                 |
| No                                                   | 320 (62%)                 |
| Follow-Up Month '48' (Visit at Year ~4) <sup>h</sup> | 56.7 (6.5) [48.0, 80.0]   |
| Follow-Up Month '72' (Visit at Year ~6) <sup>h</sup> | 80.0 (6.8) [71.0, 115.0]  |
| Follow-Up Month '96' (Visit at Year ~8) <sup>h</sup> | 115.3 (8.1) [97.0, 142.0] |

### Effect Modifiers

|                                  |           |
|----------------------------------|-----------|
| Fetal Sex                        |           |
| Male                             | 267 (52%) |
| Female                           | 250 (48%) |
| FA Intake (mcg/day) <sup>i</sup> |           |
| <600 mcg/day                     | 97 (22%)  |
| ≥600 mcg/day                     | 339 (78%) |

<sup>a</sup> Mean (SD) [Range]; n (%). Data shown has PM<sub>2.5</sub> exposure information available and with at least one measurement of the outcome across follow-up visits.

<sup>b</sup> From 2 months before last menstrual period (LMP) to month 22 after LMP.

<sup>c</sup> Estimated from self-reported height at recruitment (trimester 2) and the LMP reported weight obtained from a linear mixed-effects model.

<sup>d</sup> Household socio-economic status index.

<sup>e</sup> Any cardiometabolic medication self-reported cumulatively at month 48 follow-up visit, prior to or at the 72 month follow-up visit, and prior to or at the 96 month follow-up visit, respectively.

<sup>f</sup> Any alcohol intake self-reported during pregnancy, at each respective follow-up stage (48, 72, or 96 months), or report of previous alcohol intake (ever drinking) before pregnancy.

<sup>g</sup> Self-reported additional pregnancy or pregnancies by each respective follow-up stage (48, 72, or 96 months) after index pregnancy (parturition).

<sup>h</sup> Continuous time component included as effect modifier in analyses. Missing participants across visits were n=62 at year ~4, n=51 at year ~6, and n=16 at year ~8.

<sup>i</sup> Average FA intake during pregnancy (average of trimesters 2 and 3). n=81 participants with missing information and not included in stratified analyses.

**Table 2. Participant Cardiometabolic Outcomes at each Follow-up Visit <sup>a</sup>**

|                                             | 48 Months (~4 Years)<br>Mean (SD) [Range] | 72 Months (~6 Years)<br>Mean (SD) [Range] | 96 Months (~8 Years)<br>Mean (SD) [Range] |
|---------------------------------------------|-------------------------------------------|-------------------------------------------|-------------------------------------------|
| <i><u>Anthropometric Measures</u></i>       |                                           |                                           |                                           |
| Body Mass Index (BMI in kg/m <sup>2</sup> ) | 27.5 (4.9) [16.4, 45.4]<br>n=455          | 28.0 (5.1) [17.9, 49.6]<br>n=426          | 29.1 (5.2) [16.1, 53.7]<br>n=503          |
| Waist Circumference (WC in cm)              | 94.2 (12.2) [63.6, 133.3]<br>n=440        | 92.6 (11.9) [61.1, 132.6]<br>n=453        | 95.3 (13.0) [62.9, 167.6]<br>n=492        |
| Body Fat (%)                                | 38.1 (6.6) [16.3, 53.9]<br>n=439          | 38.4 (7.0) [3.0, 54.7]<br>n=451           | 40.4 (6.2) [19.9, 54.3]<br>n=493          |
| <i><u>Cholesterol Levels</u></i>            |                                           |                                           |                                           |
| Total Cholesterol (mg/dL)                   | 185.2 (39.5) [98.0, 441.0]<br>n=447       | 179.8 (32.9) [74.0, 407.0]<br>n=462       | 179.1 (34.1) [91.0, 322.0]<br>n=499       |
| High-Density Lipoprotein (HDL in mg/dL)     | 51.3 (12.1) [29.5, 163.0]<br>n=447        | 48.6 (11.9) [10.5, 135.4]<br>n=462        | 47.2 (11.0) [21.0, 93.0]<br>n=499         |
| Low-Density Lipoprotein (LDL in mg/dL)      | 108.5 (33.9) [17.3, 308.2]<br>n=447       | 103.6 (27.9) [22.1, 261.6]<br>n=462       | 104.7 (29.0) [10.8, 226.5]<br>n=499       |

<sup>a</sup> Data shown has PM<sub>2.5</sub> exposure information available and was restricted to observations with at least one of the outcomes of interest at each stage.

**Figure 1.** Estimates of the association (blue dots) and 95% confidence interval (95% CI) (grey whiskers) between monthly  $PM_{2.5}$  exposure and anthropometric measures Body Mass Index (BMI), Waist Circumference (WC), body fat percentage at 48, 72, and 96 months (~4, 6, 8 years) after delivery using distributed lag interaction models (DLIMs) with penalization and non-linear modification. Negative and positive values on the x-axis indicate months before and after last menstrual period (LMP), respectively. Month 0 indicates the LMP month (month 0). Models were adjusted for age, pre-pregnancy BMI, socio-economic status, smoking during pregnancy, marital status, parity at enrollment, meteorological season, cardiometabolic medications, alcohol intake, multiple pregnancies throughout follow-up, stage, and follow-up time in months squared to allow for a non-linear effect. Sample sizes for analyses with BMI were  $n=516$  and sample sizes for analyses with WC and body fat were  $n=515$ .

**Figure 2.** Estimates of the association (blue dots) and 95% confidence interval (95% CI) (grey whiskers) between monthly  $PM_{2.5}$  exposure and total cholesterol, high-density lipoprotein (HDL), low-density lipoprotein (LDL) at 48, 72, and 96 months (~4, 6, and 8 years) after delivery using distributed lag interaction models (DLIMs) with penalization and non-linear modification. Negative and positive values on the x-axis indicate months before and after last menstrual period (LMP), respectively. Month 0 indicates the LMP month (month 0). Models were adjusted for age, pre-pregnancy BMI, socio-economic status, smoking during pregnancy, marital status, parity at enrollment, meteorological season, cardiometabolic medications, alcohol intake, multiple pregnancies throughout follow-up, stage, and follow-up time in months squared to allow for a non-linear effect. Sample sizes for analyses with total cholesterol, HDL, and LDL were  $n=517$ .

## References

1. Arnett DK, Blumenthal RS, Albert MA, et al. 2019 ACC/AHA Guideline on the Primary Prevention of Cardiovascular Disease: Executive Summary: A Report of the American College of Cardiology/American Heart Association Task Force on Clinical Practice Guidelines. *Circulation*. Sep 10 2019;140(11):e563-e595. doi:10.1161/cir.0000000000000677
2. Grundy SM, Stone NJ, Bailey AL, et al. 2018 AHA/ACC/AACVPR/AAPA/ABC/ACPM/ADA/AGS/APhA/ASPC/NLA/PCNA Guideline on the Management of Blood Cholesterol: Executive Summary: A Report of the American College of Cardiology/American Heart Association Task Force on Clinical Practice Guidelines. *Journal of the American College of Cardiology*. 2019/06/25/ 2019;73(24):3168-3209. doi:<https://doi.org/10.1016/j.jacc.2018.11.002>
3. Roth GA, Mensah GA, Johnson CO, et al. Global Burden of Cardiovascular Diseases and Risk Factors, 1990-2019: Update From the GBD 2019 Study. *J Am Coll Cardiol*. Dec 22 2020;76(25):2982-3021. doi:10.1016/j.jacc.2020.11.010
4. O'Hearn M, Lauren BN, Wong JB, Kim DD, Mozaffarian D. Trends and Disparities in Cardiometabolic Health Among U.S. Adults, 1999-2018. *J Am Coll Cardiol*. Jul 12 2022;80(2):138-151. doi:10.1016/j.jacc.2022.04.046
5. Miranda JJ, Barrientos-Gutiérrez T, Corvalan C, et al. Understanding the rise of cardiometabolic diseases in low- and middle-income countries. *Nature Medicine*. 2019/11/01 2019;25(11):1667-1679. doi:10.1038/s41591-019-0644-7
6. Rojas-Martínez R, Aguilar-Salinas CA, Romero-Martínez M, Castro-Porras L, Gómez-Velasco D, Mehta R. Trends in the prevalence of metabolic syndrome and its components in Mexican adults, 2006-2018. *Salud Publica Mex*. Nov 5 2021;63(6, Nov-Dic):713-724. doi:10.21149/12835
7. Marquezine GF, Oliveira CM, Pereira AC, Krieger JE, Mill JG. Metabolic syndrome determinants in an urban population from Brazil: social class and gender-specific interaction. *Int J Cardiol*. Sep 26 2008;129(2):259-65. doi:10.1016/j.ijcard.2007.07.097
8. Florez H, Silva E, Fernández V, et al. Prevalence and risk factors associated with the metabolic syndrome and dyslipidemia in White, Black, Amerindian and Mixed Hispanics in Zulia State, Venezuela. *Diabetes Res Clin Pract*. Jul 2005;69(1):63-77. doi:10.1016/j.diabres.2004.11.018
9. GBD 2019 Diabetes in the Americas Collaborators. Burden of diabetes and hyperglycaemia in adults in the Americas, 1990-2019: a systematic analysis for the Global Burden of Disease Study 2019. *Lancet Diabetes Endocrinol*. Sep 2022;10(9):655-667. doi:10.1016/s2213-8587(22)00186-3
10. Castro-Porras LV, Rojas-Martínez R, Aguilar-Salinas CA, Bello-Chavolla OY, Becerril-Gutierrez C, Escamilla-Nuñez C. Trends and age-period-cohort effects on hypertension mortality rates from 1998 to 2018 in Mexico. *Sci Rep*. Sep 2 2021;11(1):17553. doi:10.1038/s41598-021-96175-0
11. Javed Z, Maqsood MH, Amin Z, Nasir K. Race and Ethnicity and Cardiometabolic Risk Profile: Disparities Across Income and Health Insurance in a National Sample of US Adults. *Journal of Public Health Management and Practice*. 2022;28(Supplement 1):S91-S100. doi:10.1097/phh.0000000000001441
12. Heiss G, Snyder ML, Teng Y, et al. Prevalence of Metabolic Syndrome Among Hispanics/Latinos of Diverse Background: The Hispanic Community Health Study/Study of Latinos. *Diabetes Care*. 2014;37(8):2391-2399. doi:10.2337/dc13-2505
13. Hernández-Alcaraz C, Aguilar-Salinas CA, Mendoza-Herrera K, et al. Dyslipidemia prevalence, awareness, treatment and control in Mexico: results of the Ensanut 2012. *Salud Publica Mex*. Mar-Apr 2020;62(2):137-146. Prevalencia de dislipidemias, diagnóstico previo, tratamiento y control: resultados de la Ensanut 2012. doi:10.21149/10520
14. Barquera S, Hernández-Barrera L, Trejo-Valdivia B, Shamah T, Campos-Nonato I, Rivera-Dommarco J. Obesity in Mexico, prevalence and trends in adults. Ensanut 2018-19. *salud pública de méxico*. 2020;62(6):682-692.
15. Tseng C-Y. Characteristics of Atmospheric PM<sub>2.5</sub> in a Densely Populated City with Multi-Emission Sources. *Aerosol and Air Quality Research*. 2016;16(9):2145-2158. doi:10.4209/aaqr.2016.06.0269
16. Kim KH, Kabir E, Kabir S. A review on the human health impact of airborne particulate matter. *Environ Int*. Jan 2015;74:136-43. doi:10.1016/j.envint.2014.10.005
17. Li Z, Tang Y, Song X, Lazar L, Li Z, Zhao J. Impact of ambient PM<sub>2.5</sub> on adverse birth outcome and potential molecular mechanism. *Ecotoxicol Environ Saf*. Mar 2019;169:248-254. doi:10.1016/j.ecoenv.2018.10.109
18. Nieuwenhuijsen MJ, Basagaña X, Davvand P, et al. Air pollution and human fertility rates. *Environ Int*. Sep 2014;70:9-14. doi:10.1016/j.envint.2014.05.005
19. Carré J, Gatimel N, Moreau J, Parinaud J, Léandri R. Does air pollution play a role in infertility?: a systematic review. *Environ Health*. Jul 28 2017;16(1):82. doi:10.1186/s12940-017-0291-8

20. Saleem A, Awan T, Akhtar MF. A comprehensive review on endocrine toxicity of gaseous components and particulate matter in smog. Review. *Frontiers in Endocrinology*. 2024-January-30 2024;15doi:10.3389/fendo.2024.1294205
21. Kim JS, Chen Z, Alderete TL, et al. Associations of air pollution, obesity and cardiometabolic health in young adults: The Meta-AIR study. *Environ Int*. Dec 2019;133(Pt A):105180. doi:10.1016/j.envint.2019.105180
22. Furlong MA, Klimentidis YC. Associations of air pollution with obesity and body fat percentage, and modification by polygenic risk score for BMI in the UK Biobank. *Environ Res*. Jun 2020;185:109364. doi:10.1016/j.envres.2020.109364
23. Luo H, Zhang Q, Yu K, Meng X, Kan H, Chen R. Long-term exposure to ambient air pollution is a risk factor for trajectory of cardiometabolic multimorbidity: A prospective study in the UK Biobank. *EBioMedicine*. Oct 2022;84:104282. doi:10.1016/j.ebiom.2022.104282
24. Xu X, Yavar Z, Verdin M, et al. Effect of early particulate air pollution exposure on obesity in mice: role of p47phox. *Arterioscler Thromb Vasc Biol*. Dec 2010;30(12):2518-27. doi:10.1161/ATVBAHA.110.215350
25. Sun Q, Yue P, DeLuca JA, et al. Ambient air pollution exaggerates adipose inflammation and insulin resistance in a mouse model of diet-induced obesity. *Circulation*. Feb 3 2009;119(4):538-46. doi:CIRCULATIONAHA.108.799015 [pii] 10.1161/CIRCULATIONAHA.108.799015
26. Wallwork RS, Colicino E, Zhong J, et al. Ambient Fine Particulate Matter, Outdoor Temperature, and Risk of Metabolic Syndrome. *Am J Epidemiol*. Jan 1 2017;185(1):30-39. doi:10.1093/aje/kww157
27. Dabass A, Talbott EO, Venkat A, et al. Association of exposure to particulate matter (PM2.5) air pollution and biomarkers of cardiovascular disease risk in adult NHANES participants (2001-2008). *Int J Hyg Environ Health*. May 2016;219(3):301-10. doi:10.1016/j.ijheh.2015.12.002
28. Yitshak Sade M, Kloog I, Liberty IF, Schwartz J, Novack V. The Association Between Air Pollution Exposure and Glucose and Lipids Levels. *J Clin Endocrinol Metab*. Jun 2016;101(6):2460-7. doi:10.1210/jc.2016-1378
29. Tamayo-Ortiz M, Téllez-Rojo MM, Rothenberg SJ, et al. Exposure to PM2.5 and Obesity Prevalence in the Greater Mexico City Area. *International Journal of Environmental Research and Public Health*. 2021;18(5):2301.
30. Colicino E, Ferrari F, Cowell W, et al. Non-linear and non-additive associations between the pregnancy metabolome and birthweight. *Environment International*. 2021/11/01/ 2021;156:106750. doi:<https://doi.org/10.1016/j.envint.2021.106750>
31. Colicino E, Cowell W, Foppa Pedretti N, et al. Maternal steroids during pregnancy and their associations with ambient air pollution and temperature during preconception and early gestational periods. *Environment International*. 2022/07/01/ 2022;165:107320. doi:<https://doi.org/10.1016/j.envint.2022.107320>
32. Gangwar RS, Bevan GH, Palanivel R, Das L, Rajagopalan S. Oxidative stress pathways of air pollution mediated toxicity: Recent insights. *Redox Biol*. Jul 2020;34:101545. doi:10.1016/j.redox.2020.101545
33. Rao X, Zhong J, Brook RD, Rajagopalan S. Effect of Particulate Matter Air Pollution on Cardiovascular Oxidative Stress Pathways. *Antioxid Redox Signal*. Mar 20 2018;28(9):797-818. doi:10.1089/ars.2017.7394
34. Incalza MA, D'Oria R, Natalicchio A, Perrini S, Laviola L, Giorgino F. Oxidative stress and reactive oxygen species in endothelial dysfunction associated with cardiovascular and metabolic diseases. *Vascul Pharmacol*. Jan 2018;100:1-19. doi:10.1016/j.vph.2017.05.005
35. Sun M, Yan W, Fang K, et al. The correlation between PM(2.5) exposure and hypertensive disorders in pregnancy: A Meta-analysis. *Sci Total Environ*. Feb 10 2020;703:134985. doi:10.1016/j.scitotenv.2019.134985
36. Hu H, Ha S, Xu X. Ozone and hypertensive disorders of pregnancy in Florida: Identifying critical windows of exposure. *Environ Res*. Feb 2017;153:120-125. doi:10.1016/j.envres.2016.12.002
37. Lu C, Zhang W, Zheng X, Sun J, Chen L, Deng Q. Combined effects of ambient air pollution and home environmental factors on low birth weight. *Chemosphere*. Feb 2020;240:124836. doi:10.1016/j.chemosphere.2019.124836
38. Chen Q, Ren Z, Liu Y, et al. The Association between Preterm Birth and Ambient Air Pollution Exposure in Shiyuan, China, 2015-2017. *Int J Environ Res Public Health*. Apr 19 2021;18(8)doi:10.3390/ijerph18084326
39. Patterson WB, Glasson J, Naik N, et al. Prenatal exposure to ambient air pollutants and early infant growth and adiposity in the Southern California Mother's Milk Study. *Environ Health*. Jun 5 2021;20(1):67. doi:10.1186/s12940-021-00753-8
40. McGuinn LA, Bellinger DC, Colicino E, et al. Prenatal PM(2.5) exposure and behavioral development in children from Mexico City. *Neurotoxicology*. Dec 2020;81:109-115. doi:10.1016/j.neuro.2020.09.036

41. Warin M, Moore V, Zivkovic T, Davies M. Telescoping the origins of obesity to women's bodies: how gender inequalities are being squeezed out of Barker's hypothesis. *Annals of human biology*. Jul 2011;38(4):453-60. doi:10.3109/03014460.2011.591829
42. Varshavsky J, Smith A, Wang A, et al. Heightened susceptibility: A review of how pregnancy and chemical exposures influence maternal health. *Reprod Toxicol*. Mar 2020;92:14-56. doi:10.1016/j.reprotox.2019.04.004
43. Kalagiri RR, Carder T, Choudhury S, et al. Inflammation in Complicated Pregnancy and Its Outcome. *Am J Perinatol*. Dec 2016;33(14):1337-1356. doi:10.1055/s-0036-1582397
44. Kamity R, Sharma S, Hanna N. MicroRNA-Mediated Control of Inflammation and Tolerance in Pregnancy. *Front Immunol*. 2019;10:718. doi:10.3389/fimmu.2019.00718
45. Tenório MB, Ferreira RC, Moura FA, Bueno NB, de Oliveira ACM, Goulart MOF. Cross-Talk between Oxidative Stress and Inflammation in Preeclampsia. *Oxid Med Cell Longev*. 2019;2019:8238727. doi:10.1155/2019/8238727
46. Dalfra MG, Burlina S, Lapolla A. Weight gain during pregnancy: A narrative review on the recent evidences. *Diabetes Res Clin Pract*. Jun 2022;188:109913. doi:10.1016/j.diabres.2022.109913
47. Wang LJ, Fan DZ, Guo HX, Chen BS, Liu ZP. Weight gain during pregnancy and placenta morphology: a prospective cohort study. *Eur Rev Med Pharmacol Sci*. Mar 2022;26(6):1978-1983. doi:10.26355/eurrev\_202203\_28346
48. Committee to Reexamine IOM Pregnancy Weight Guidelines, ed. *Weight Gain During Pregnancy: Reexamining the Guidelines*. Institute of Medicine and National Research Council; 2009. Rasmussen KM, Yaktine AL, eds.
49. Rich-Edwards JW, McElrath TF, Karumanchi SA, Seely EW. Breathing life into the lifecourse approach: pregnancy history and cardiovascular disease in women. *Hypertension*. Sep 2010;56(3):331-4. doi:10.1161/HYPERTENSIONAHA.110.156810
50. Kaaja RJ, Greer IA. Manifestations of chronic disease during pregnancy. *JAMA*. Dec 7 2005;294(21):2751-7. doi:10.1001/jama.294.21.2751
51. Lee KK, E AR, Lee AJ, et al. 115 Maternal Obesity during Pregnancy and Premature Cardiovascular Mortality in Later Life. *Heart*. Jun 2014;100 Suppl 3:A65-6. doi:10.1136/heartjnl-2014-306118.115
52. Ross LE, McLean LM. Anxiety disorders during pregnancy and the postpartum period: A systematic review. *The Journal of clinical psychiatry*. Aug 2006;67(8):1285-98.
53. Demateis D, Keller KP, Rojas-Rueda D, Kioumourtzoglou M-A, Wilson A. Penalized distributed lag interaction model: Air pollution, birth weight, and neighborhood vulnerability. *Environmetrics*. 2024;35(4):e2843. doi:<https://doi.org/10.1002/env.2843>
54. Broere-Brown ZA, Adank MC, Benschop L, et al. Fetal sex and maternal pregnancy outcomes: a systematic review and meta-analysis. *Biology of Sex Differences*. 2020/05/11 2020;11(1):26. doi:10.1186/s13293-020-00299-3
55. Li Q, Wang Y-Y, Guo Y, et al. Folic Acid Supplementation and the Association between Maternal Airborne Particulate Matter Exposure and Preterm Delivery: A National Birth Cohort Study in China. *Environmental Health Perspectives*. 2020;128(12):127010. doi:doi:10.1289/EHP6386
56. Braun JM, Wright RJ, Just AC, et al. Relationships between lead biomarkers and diurnal salivary cortisol indices in pregnant women from Mexico City: a cross-sectional study. *Environ Health*. Jun 10 2014;13(1):50. doi:10.1186/1476-069x-13-50
57. Gutiérrez-Avila I, Arfer KB, Carrión D, et al. Prediction of daily mean and one-hour maximum PM2.5 concentrations and applications in Central Mexico using satellite-based machine-learning models. *Journal of Exposure Science & Environmental Epidemiology*. 2022/09/10 2022;doi:10.1038/s41370-022-00471-4
58. Soria-Contreras DC, Trejo-Valdivia B, Cantoral A, et al. Patterns of Weight Change One Year after Delivery Are Associated with Cardiometabolic Risk Factors at Six Years Postpartum in Mexican Women. *Nutrients*. Jan 7 2020;12(1)doi:10.3390/nu12010170
59. Centers for Disease Control and Prevention NCFHS. NHANES 2019-2020 Procedure Manuals. 2024. <https://www.cdc.gov/nchs/nhanes/continuousnhanes/manuals.aspx?BeginYear=2019>
60. Ostchega Y SR, Sarafrazi Isfahani N, Zhang G, Hughes JP, Miller I. . Waist circumference measurement methodology study: National Health and Nutrition Examination Survey, 2016. Centers for Disease Control and Prevention, National Center for Health Statistics. Vital Health Stat. 2024. [https://www.cdc.gov/nchs/data/series/sr\\_02/sr02\\_182-508.pdf](https://www.cdc.gov/nchs/data/series/sr_02/sr02_182-508.pdf)
61. Friedewald WT, Levy RI, Fredrickson DS. Estimation of the concentration of low-density lipoprotein cholesterol in plasma, without use of the preparative ultracentrifuge. *Clin Chem*. Jun 1972;18(6):499-502.
62. Capurro H, Konichezky S, Fonseca D, Caldeyro-Barcia R. A simplified method for diagnosis of gestational age in the newborn infant. *The Journal of Pediatrics*. 1978;93(1):120-122. doi:10.1016/S0022-3476(78)80621-0



63. Thomas DM, Oken E, Rifas-Shiman SL, et al. Do Women Know Their Prepregnancy Weight? *Obesity*. 2019;27(7):1161-1167. doi:<https://doi.org/10.1002/oby.22502>
64. AV C. The AMAL system of classifying households by socio-economic level: ESOMAR. 2002;
65. Bartz-Beielstein SMA. imputeTS: Time Series Missing Value Imputation in R. *The R Journal*. 2017;9(1):207-218. doi:10.32614/RJ-2017-009
66. Schummers L, Hutcheon JA, Hacker MR, et al. Absolute risks of obstetric outcomes by maternal age at first birth: a population-based cohort. *Epidemiology*. May 2018;29(3):379-387. doi:10.1097/ede.0000000000000818
67. Wang X, Karvonen-Gutierrez CA, Gold EB, et al. Longitudinal Associations of Air Pollution With Body Size and Composition in Midlife Women: The Study of Women's Health Across the Nation. *Diabetes Care*. Nov 1 2022;45(11):2577-2584. doi:10.2337/dc22-0963
68. Chi GC, Hajat A, Bird CE, et al. Individual and Neighborhood Socioeconomic Status and the Association between Air Pollution and Cardiovascular Disease. *Environ Health Perspect*. Dec 2016;124(12):1840-1847. doi:10.1289/ehp199
69. Patel K, Hargreaves MK, Liu J, et al. Relationship between smoking and obesity among women. *Am J Health Behav*. Sep 2011;35(5):627-36. doi:10.5993/ajhb.35.5.11
70. Fu M, Martínez-Sánchez JM, Galán I, et al. Variability in the correlation between nicotine and PM2.5 as airborne markers of second-hand smoke exposure. *Environ Res*. Nov 2013;127:49-55. doi:10.1016/j.envres.2013.09.003
71. Wickrama KAS, O'Neal CW, Nepl TK. Midlife Family Economic Hardship and Later Life Cardiometabolic Health: The Protective Role of Marital Integration. *Gerontologist*. Sep 17 2019;59(5):892-901. doi:10.1093/geront/gny047
72. Stokes JE, Barooah A. Dyadic Loneliness and Changes to HbA1c Among Older US Couples: The Role of Marital Support as Stress Buffer. *J Aging Health*. Oct 2021;33(9):698-708. doi:10.1177/08982643211006498
73. Li W, Ruan W, Lu Z, Wang D. Parity and risk of maternal cardiovascular disease: A dose-response meta-analysis of cohort studies. *European Journal of Preventive Cardiology*. 2020;26(6):592-602. doi:10.1177/2047487318818265
74. Mahalingaiah S, Hart JE, Laden F, et al. Adult air pollution exposure and risk of infertility in the Nurses' Health Study II. *Hum Reprod*. Mar 2016;31(3):638-47. doi:10.1093/humrep/dev330
75. Zhang L, An J, Liu M, et al. Spatiotemporal variations and influencing factors of PM(2.5) concentrations in Beijing, China. *Environ Pollut*. Jul 2020;262:114276. doi:10.1016/j.envpol.2020.114276
76. Blauw LL, Aziz NA, Tannemaat MR, et al. Diabetes incidence and glucose intolerance prevalence increase with higher outdoor temperature. *BMJ Open Diabetes Res Care*. 2017;5(1):e000317. doi:10.1136/bmjdr-2016-000317
77. Nesti L, Natali A. Metformin effects on the heart and the cardiovascular system: A review of experimental and clinical data. *Nutrition, Metabolism and Cardiovascular Diseases*. 2017;27(8):657-669. doi:10.1016/j.numecd.2017.04.009
78. Molenaar EA, Massaro JM, Jacques PF, et al. Association of lifestyle factors with abdominal subcutaneous and visceral adiposity: the Framingham Heart Study. *Diabetes Care*. Mar 2009;32(3):505-10. doi:10.2337/dc08-1382
79. Clifton VL. Review: Sex and the Human Placenta: Mediating Differential Strategies of Fetal Growth and Survival. *Placenta*. 2010/03/01/ 2010;31:S33-S39. doi:<https://doi.org/10.1016/j.placenta.2009.11.010>
80. Morisset A-S, Dubé M-C, Drolet R, et al. Androgens in the maternal and fetal circulation: association with insulin resistance. *The Journal of Maternal-Fetal & Neonatal Medicine*. 2013/03/01 2013;26(5):513-519. doi:10.3109/14767058.2012.735725
81. India-Aldana S, Midya V, Betanzos-Robledo L, et al. Metabolism-Disrupting Chemical Mixtures during Pregnancy, Folic Acid Supplementation, and Liver Injury in Mother-Child Pairs. *medRxiv*. 2024:2024.06.13.24308903. doi:10.1101/2024.06.13.24308903
82. National Institutes of Health Office of Dietary Supplements. Folate. 2024. <https://ods.od.nih.gov/factsheets/Folate-HealthProfessional/>
83. Ramlakhan KP, Johnson MR, Roos-Hesselink JW. Pregnancy and cardiovascular disease. *Nature Reviews Cardiology*. 2020/11/01 2020;17(11):718-731. doi:10.1038/s41569-020-0390-z
84. Rong K, Yu K, Han X, et al. Pre-pregnancy BMI, gestational weight gain and postpartum weight retention: a meta-analysis of observational studies. *Public Health Nutr*. Aug 2015;18(12):2172-82. doi:10.1017/s1368980014002523
85. Basu S, Haghiaç M, Surace P, et al. Pregravid obesity associates with increased maternal endotoxemia and metabolic inflammation. *Obesity (Silver Spring)*. Mar 2011;19(3):476-82. doi:10.1038/oby.2010.215
86. Egger G, Dixon J. Should obesity be the main game? Or do we need an environmental makeover to combat the inflammatory and chronic disease epidemics? *Obes Rev*. Mar 2009;10(2):237-49. doi:10.1111/j.1467-789X.2008.00542.x

87. Watanabe Y, Nagai Y, Takatsu K. Activation and regulation of the pattern recognition receptors in obesity-induced adipose tissue inflammation and insulin resistance. *Nutrients*. Sep 23 2013;5(9):3757-78. doi:10.3390/nu5093757
88. Butte NF. Carbohydrate and lipid metabolism in pregnancy: normal compared with gestational diabetes mellitus. *The American Journal of Clinical Nutrition*. 2000;71(5):1256S-1261S. doi:10.1093/ajcn/71.5.1256s
89. Grimes SB, Wild R. Effect of Pregnancy on Lipid Metabolism and Lipoprotein Levels. In: Feingold KR, Anawalt B, Boyce A, et al, eds. *Endotext*. MDText.com, Inc.
- Copyright © 2000-2022, MDText.com, Inc.; 2000.
90. Bosaeus M, Andersson-Hall U, Andersson L, Karlsson T, Ellegård L, Holmäng A. Body Composition During Pregnancy: Longitudinal Changes and Method Comparisons. *Reprod Sci*. Jul 2020;27(7):1477-1489. doi:10.1007/s43032-020-00141-6
91. To WW, Wong MW. Body fat composition and weight changes during pregnancy and 6-8 months post-partum in primiparous and multiparous women. *Aust N Z J Obstet Gynaecol*. Feb 2009;49(1):34-8. doi:10.1111/j.1479-828X.2008.00933.x
92. Sattar N, Greer IA, Pirwani I, Gibson J, Wallace AM. Leptin levels in pregnancy: marker for fat accumulation and mobilization? *Acta Obstet Gynecol Scand*. Mar 1998;77(3):278-83.
93. Bochkur Dratver MA, Arenas J, Thaweethai T, et al. Longitudinal changes in glucose during pregnancy in women with gestational diabetes risk factors. *Diabetologia*. Mar 2022;65(3):541-551. doi:10.1007/s00125-021-05622-0
94. Di Cianni G, Miccoli R, Volpe L, Lencioni C, Del Prato S. Intermediate metabolism in normal pregnancy and in gestational diabetes. *Diabetes/metabolism research and reviews*. Jul-Aug 2003;19(4):259-70. doi:10.1002/dmrr.390
95. Bowe B, Gibson AK, Xie Y, et al. Ambient Fine Particulate Matter Air Pollution and Risk of Weight Gain and Obesity in United States Veterans: An Observational Cohort Study. *Environ Health Perspect*. Apr 2021;129(4):47003. doi:10.1289/ehp7944
96. Zhang N, Wang L, Zhang M, Nazroo J. Air quality and obesity at older ages in China: The role of duration, severity and pollutants. *PLoS One*. 2019;14(12):e0226279. doi:10.1371/journal.pone.0226279
97. Li X, Wang M, Song Y, et al. Obesity and the relation between joint exposure to ambient air pollutants and incident type 2 diabetes: A cohort study in UK Biobank. *PLoS Med*. Aug 2021;18(8):e1003767. doi:10.1371/journal.pmed.1003767
98. Yeatts K, Svendsen E, Creason J, et al. Coarse particulate matter (PM<sub>2.5-10</sub>) affects heart rate variability, blood lipids, and circulating eosinophils in adults with asthma. *Environ Health Perspect*. May 2007;115(5):709-14. doi:10.1289/ehp.9499
99. Wilkins JT, Ning H, Stone NJ, et al. Coronary heart disease risks associated with high levels of HDL cholesterol. *J Am Heart Assoc*. Mar 13 2014;3(2):e000519. doi:10.1161/jaha.113.000519
100. Bittner V. Lipoprotein abnormalities related to women's health. *Am J Cardiol*. Oct 17 2002;90(8a):77i-84i. doi:10.1016/s0002-9149(02)02637-1
101. Kaze AD, Santhanam P, Musani SK, Ahima R, Echouffo-Tcheugui JB. Metabolic Dyslipidemia and Cardiovascular Outcomes in Type 2 Diabetes Mellitus: Findings From the Look AHEAD Study. *J Am Heart Assoc*. Apr 6 2021;10(7):e016947. doi:10.1161/jaha.120.016947
102. Duncan MS, Vasan RS, Xanthakis V. Trajectories of Blood Lipid Concentrations Over the Adult Life Course and Risk of Cardiovascular Disease and All-Cause Mortality: Observations From the Framingham Study Over 35 Years. *J Am Heart Assoc*. Jun 4 2019;8(11):e011433. doi:10.1161/jaha.118.011433
103. Fernandez ML, Jones JJ, Ackerman D, et al. Low HDL cholesterol is associated with increased atherogenic lipoproteins and insulin resistance in women classified with metabolic syndrome. *Nutr Res Pract*. Dec 2010;4(6):492-8. doi:10.4162/nrp.2010.4.6.492
104. Zhang J, Chen G, Liang S, et al. PM<sub>2.5</sub> exposure exaggerates the risk of adverse birth outcomes in pregnant women with pre-existing hyperlipidemia: Modulation role of adipokines and lipidome. *Sci Total Environ*. Sep 15 2021;787:147604. doi:10.1016/j.scitotenv.2021.147604
105. Ernhart CB, Morrow-Tlucak M, Sokol RJ, Martier S. Underreporting of alcohol use in pregnancy. *Alcohol Clin Exp Res*. Aug 1988;12(4):506-11. doi:10.1111/j.1530-0277.1988.tb00233.x
106. Shipton D, Tappin DM, Vadiveloo T, Crossley JA, Aitken DA, Chalmers J. Reliability of self reported smoking status by pregnant women for estimating smoking prevalence: a retrospective, cross sectional study. *Bmj*. Oct 29 2009;339:b4347. doi:10.1136/bmj.b4347

107. Nakling J, Buhaug H, Backe B. The biologic error in gestational length related to the use of the first day of last menstrual period as a proxy for the start of pregnancy. *Early Hum Dev.* Oct 2005;81(10):833-9. doi:10.1016/j.earlhumdev.2005.06.004
108. Baskett TF, Nagele F. Naegele's rule: a reappraisal. *BJOG: An International Journal of Obstetrics & Gynaecology.* 2000;107(11):1433-1435. doi:<https://doi.org/10.1111/j.1471-0528.2000.tb11661.x>
109. Miller WG, Myers GL, Sakurabayashi I, et al. Seven direct methods for measuring HDL and LDL cholesterol compared with ultracentrifugation reference measurement procedures. *Clin Chem.* Jun 2010;56(6):977-86. doi:10.1373/clinchem.2009.142810
110. Langlois MR, Chapman MJ, Cobbaert C, et al. Quantifying Atherogenic Lipoproteins: Current and Future Challenges in the Era of Personalized Medicine and Very Low Concentrations of LDL Cholesterol. A Consensus Statement from EAS and EFLM. *Clin Chem.* Jul 2018;64(7):1006-1033. doi:10.1373/clinchem.2018.287037
111. Wilson A, Chiu Y-HM, Hsu H-HL, Wright RO, Wright RJ, Coull BA. Potential for Bias When Estimating Critical Windows for Air Pollution in Children's Health. *American Journal of Epidemiology.* 2017;186(11):1281-1289. doi:10.1093/aje/kwx184
112. Barquera S, Hernández-Barrera L, Trejo-Valdivia B, Shamah T, Campos-Nonato I, Rivera-Dommarco J. [Obesity in Mexico, prevalence and trends in adults. Ensanut 2018-19.]. *Salud Publica Mex.* Nov-Dec 2020;62(6):682-692. Obesidad en México, prevalencia y tendencias en adultos. Ensanut 2018-19. doi:10.21149/11630
113. World Health Organization (WHO). What are the WHO Air quality guidelines? Accessed 5/22/2023, <https://www.who.int/news-room/feature-stories/detail/what-are-the-who-air-quality-guidelines>
114. Nugent R, Bertram MY, Jan S, et al. Investing in non-communicable disease prevention and management to advance the Sustainable Development Goals. *Lancet.* May 19 2018;391(10134):2029-2035. doi:10.1016/s0140-6736(18)30667-6
115. Nauck M, Warnick GR, Rifai N. Methods for measurement of LDL-cholesterol: a critical assessment of direct measurement by homogeneous assays versus calculation. *Clin Chem.* Feb 2002;48(2):236-54.

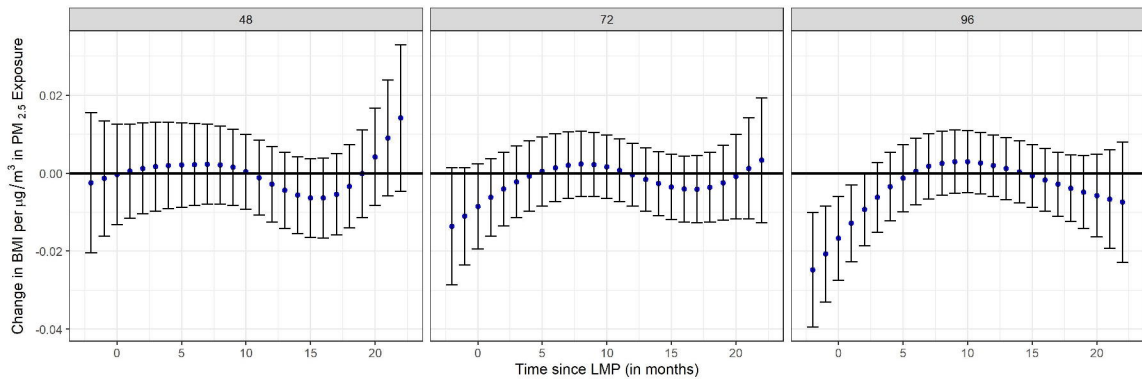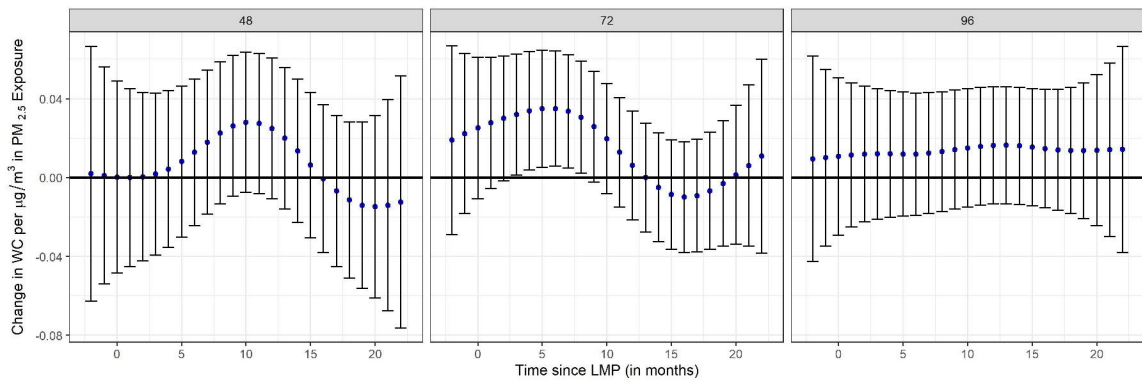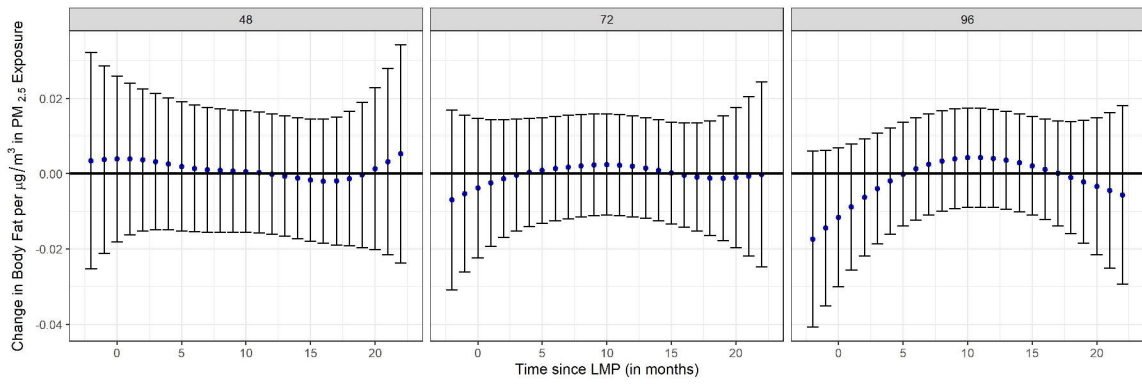

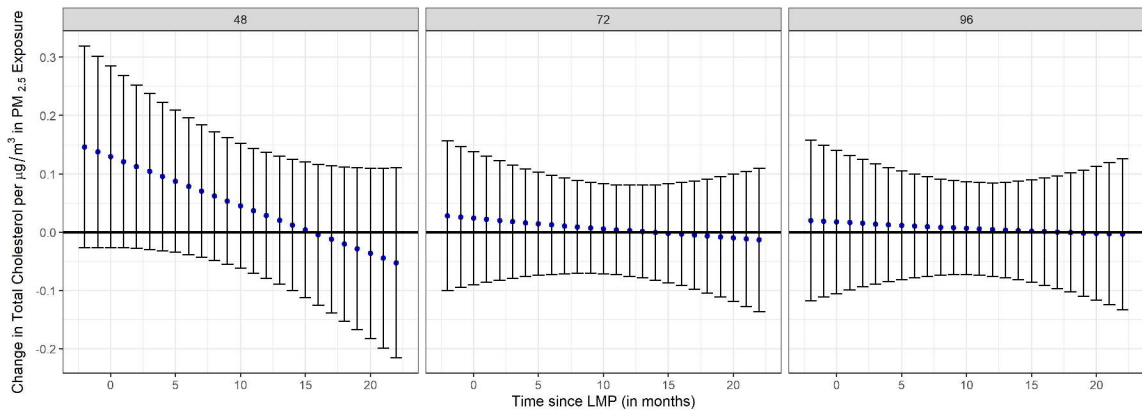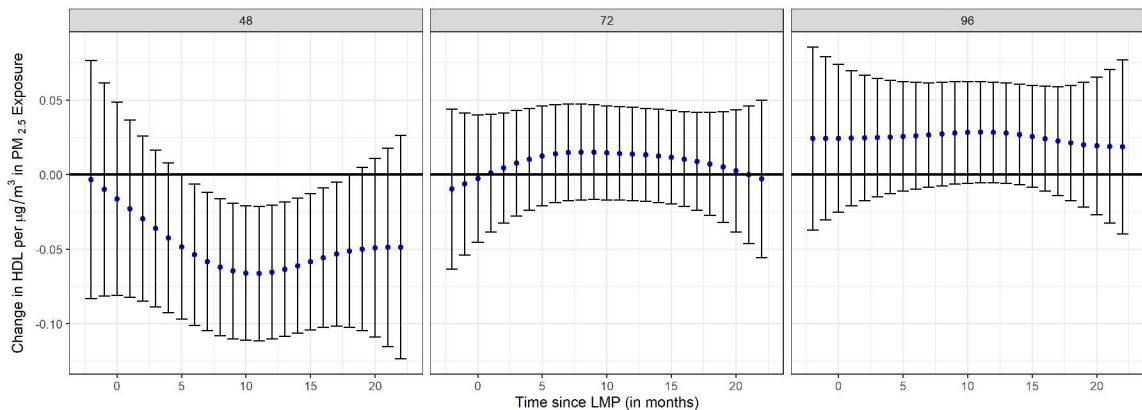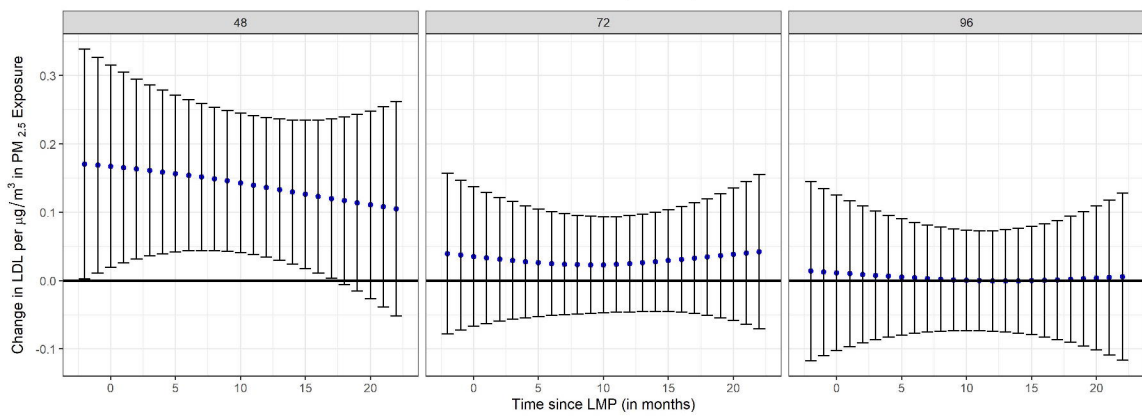

Source: https://medrxiv.org/content/10.1101/2024.11.23.24317830v1.full.pdf
